**Gastric digestion and changes in serum amino acid concentrations after consumption of casein from cow and goat milk: a randomized crossover trial in healthy men**

**Short title:** Digestion of casein from cow and goat milk

Elise J.M. van Eijnatten, PhD, Guido Camps, PhD, Wolf Rombouts, PhD, Linette Pellis, PhD, Paul A.M. Smeets, PhD

List of all authors; their positions and institutions at the time of work performed:

Elise J.M. van Eijnatten, PhD, PhD candidate at the Division of Human Nutrition and Health, Wageningen University

Guido Camps, PhD, researcher at the Division of Human Nutrition and Health, Wageningen University

Wolf Rombouts, PhD, scientist at Ausnutria Dairy Corporation Ltd

Linette Pellis, PhD, scientist at Ausnutria Dairy Corporation Ltd

Paul A.M. Smeets, PhD, senior scientist at the Division of Human Nutrition and Health, Wageningen University

Paul Smeets is associate editor at The American Journal of Clinical Nutrition and played no role in the Journal's evaluation of the manuscript.

Location of department and institution where the work was performed:

Division of Human Nutrition and Health, Wageningen University, Stippeneng 4, 6708 WE, Wageningen, The Netherlands.

Financial support: the study was funded by Ausnutria Dairy Corporation Ltd.

List of abbreviations:

|        |                                  |
|--------|----------------------------------|
| 95% CI | 95% confidence interval          |
| AA     | Amino acids                      |
| AUC    | Area under the curve             |
| BCAA   | Branch chained amino acids       |
| BMI    | Body mass index                  |
| Cow MC | Cow milk-derived micellar casein |
| EAA    | Essential amino acids            |

|         |                                   |
|---------|-----------------------------------|
| FFA     | Free fatty acids                  |
| GE      | Gastric emptying                  |
| GE-t50  | Gastric emptying half time        |
| Goat MC | Goat milk-derived micellar casein |
| MD      | Mean difference                   |
| MRI     | Magnetic resonance imaging        |
| NEAA    | Non-essential amino acids         |
| TG      | Triglycerides                     |
| UHT     | Ultra-high temperature processing |

Clinical trial registry number: NL8137 (Netherlands Trial Registry), accessible through <https://trialsearch.who.int/Trial2.aspx?TrialID=NL-OMON28580>

Corresponding author contact information:

Name: Elise van Eijnatten

Mailing address: Stippeneng 4, 6708 WE Wageningen

Telephone number: +31642565543

E-mail address: [elisevaneijnatten@hotmail.com](mailto:elisevaneijnatten@hotmail.com)

Disclosures:

Elise J.M. van Eijnatten: no conflicts of interest

Guido Camps: no conflicts of interest

Wolf Rombouts: during the study employed as a scientist at Ausnutria Dairy Corporation Ltd

Linette Pellis: during the study employed as a scientist at Ausnutria Dairy Corporation Ltd

Paul A.M. Smeets: no conflicts of interest

Author contributions to manuscript:

WR, GC and PS designed the research; EE conducted the research. EE analysed the data and drafted the paper. WR and LP helped interpreting results. GC, WR and PS revised the manuscript critically for important intellectual content. PS had primary responsibility for final content. All authors read and approved the final manuscript.

Data Transparency Statement: deidentified individual participant data that underlie the reported results will be made available upon reasonable request.

Word count: 5075

Number of figures: 5

Number of tables: 1

Supplementary data submitted: yes

1 **ABSTRACT**

2 **Background:** *In vitro* studies show that goat milk proteins form less compact coagulates in  
3 the stomach compared to cow milk proteins, which may facilitate gastric digestion and  
4 amino acid (AA) absorption. However, this has not been confirmed *in vivo* in humans.

5 **Objective:** To examine gastric digestion and changes in AA concentrations after cow milk-  
6 derived (cow MC) and goat milk-derived casein (goat MC) ingestion.

7 **Methods:** In this single-blind randomized cross-over study 18 men (age  $23 \pm 1.6$  years, BMI  
8  $23 \pm 1.6$  kg/m<sup>2</sup>) consumed 300 ml of a drink containing 30 g of cow MC or goat MC.

9 Participants underwent gastric MRI scans at baseline and every 10 minutes up to 60 minutes  
10 postprandially. Blood was drawn at baseline and up to 4 hours postprandially. In addition,  
11 participants verbally rated their appetite after each MRI measurement. Primary outcomes  
12 were gastric emptying and AA concentrations. Secondary outcome was gastric coagulation  
13 as inferred by image texture metrics.

14 **Results:** Gastric emptying half-time was  $80 \pm 25$  minutes for goat and  $85 \pm 24$  minutes for  
15 cow MC ( $p = 0.395$ ). In line with this, gastric emptying of the drinks over time was similar  
16 (MD 0.77 ml, 95% CI [-6.9, 8.5],  $p=0.845$ ). Serum essential AA (MD -110  $\mu\text{mol/L}$ , 95% CI [-162,  
17 -58]) was higher over time for cow MC ( $p<0.001$ ). The image texture metric contrast was  
18 lower for cow MC (MD 0.010, 95% CI [0.001, 0.020],  $p=0.036$ ).

19 **Conclusion:** Cow MC and goat MC have different coagulating properties, as inferred by AA  
20 concentrations and supported by image texture analysis. This did not influence overall  
21 gastric emptying or the emptying of the liquid and coagulated fractions, which were similar.  
22 This warrants further *in vivo* research on casein coagulation in the food matrix to help  
23 determine the optimal use for cow and goat milk and their protein fractions.

## 24 INTRODUCTION

25 Protein is an essential macronutrient used in many processes in the human body (Atherton  
26 and Smith 2012, Do, Lewis et al. 2019). It is important that ingested protein is properly  
27 digested and absorbed so that it can be used for protein synthesis (Mahé, Roos et al. 1996,  
28 van Vliet, Burd et al. 2015, Fardet, Dupont et al. 2019). Dairy products constitute a significant  
29 protein source globally (Lagrange, Whitsett et al. 2015). Cow milk dairy products are the  
30 most commonly used, but goat milk popularity is increasing (Miller and Lu 2019). One of the  
31 reasons for this is the consumers' perception of its health benefits. These benefits are  
32 hypothesized to originate from a difference in the milks' digestion due to their different  
33 casein composition (Roy, Moughan et al. 2022).

34

35 Cow and goat milk generally contain about 3.5 % protein of which caseins represent about  
36 80% and whey proteins about 20% (Ceballos, Morales et al. 2009). During digestion in the  
37 stomach the casein micelles (CM) are destabilized by pepsin proteolysis and acidification.  
38 This results in the formation of coagulates containing protein, and if present, fat globules  
39 (Ye, Liu et al. 2019). The physical properties of these casein coagulates could affect gastric  
40 protein digestion, gastric emptying and subsequent intestinal digestion and absorption of  
41 amino acids (AA) (Huppertz and Chia 2021). Previous studies, predominantly *in vitro*, have  
42 shown that casein coagulation is affected by several factors including processing-induced  
43 protein modifications, overall product composition (food matrix), and differences in protein  
44 composition for instance between animal species (Almaas, Cases et al. 2006, Ceballos,  
45 Morales et al. 2009, Wang, Ye et al. 2018, Mulet-Cabero, Mackie et al. 2019, Eijnatten,  
46 Roelofs et al. 2023, Hettinga, Pellis et al. 2023). Human *in vivo* studies on protein

47 modifications, resulting in different cow casein forms, showed that coagulation and gastric  
48 emptying can have strong effects on the postprandial rise in AA bioavailability (Trommelen,  
49 Weijzen et al. 2020). Even though goat micellar casein seemed to have similar protein  
50 structures on a molecular level in an *in vitro* study using X-ray scattering (Ingham,  
51 Smialowska et al. 2018), casein micelles differ in size, hydration, and mineralization  
52 compared to bovine caseins (Claeys, Verraes et al. 2014, Roy, Moughan et al. 2022). During  
53 static *in vitro* digestion, more  $\beta$ -casein and less  $\alpha$ s1-casein may contribute to the formation  
54 of looser gastric clots in goat casein micelles and therefore greater proteolysis than cow  
55 casein micelles (Zhang, Liu et al. 2023). Increased access of the enzymes to the proteins  
56 might lead to faster gastric digestion of goat as compared to cow milk-derived caseins and  
57 milk, as seen in *in vitro* coagulum analysis (Park 2017). In line with this, infant formula based  
58 on goat milk formed smaller flocs of aggregated protein and oil droplets under gastric  
59 conditions, leading to faster protein digestion in goat milk infant formula than seen in cow  
60 milk based infant formula (Ye, Cui et al. 2019). Similarly, goat milk proteins were digested  
61 faster than cow milk proteins in *in vitro* digestion by human gastric and duodenal enzymes  
62 (Almaas, Cases et al. 2006). This was also seen in two *in vitro* studies under simulated infant  
63 conditions where proteins in goat milk and goat milk-based infant formula had different  
64 digestive behaviour compared to those present in cow milk and cow milk-based formula  
65 (Maathuis, Havenaar et al. 2017, Hodgkinson, Wallace et al. 2018). Maathuis et al. controlled  
66 for gastric emptying. Therefore differences in digestion were probably due to differences in  
67 coagulation. However, not all studies showed a faster digestion of goat milk protein.  
68 Inglingstad et al. found in an *in vitro* study that more goat milk casein remained undigested  
69 after 30 min of digestion compared to cow milk casein (Inglingstad, Devold et al. 2010).  
70 Since most research has been done *in vitro* and results are not conclusive, verification *in vivo*

71 in humans is warranted. Understanding differences in coagulation and gastric emptying of  
72 cow and goat milk proteins is of interest because they may influence subsequent serum AA  
73 availability.

74

75 In summary, *in vitro* results suggest that the differences in digestion between cow and goat  
76 milk are due to differences in their casein. Therefore, the current *in vivo* study aimed to  
77 quantify gastric digestion and absorption of cow and goat milk-derived casein *in vivo* in  
78 humans. We used MRI to evaluate intragastric processes and gastric emptying and examined  
79 blood AA concentrations. We hypothesized that goat milk-derived casein has different  
80 coagulum characteristics, faster gastric emptying and higher serum AA concentrations  
81 compared to cow milk-derived casein.

82

## 83 **METHODS**

### 84 **Design**

85 The study was a randomized cross-over study in which healthy men underwent gastric MRI  
86 scans before and after consumption of 300 ml of a cow milk-derived-casein (cow MC) or goat  
87 milk-derived-casein (goat MC) drink. Primary outcomes were gastric emptying (measured by  
88 gastric emptying half time (GE-t50) and gastric volume over time) and serum AA  
89 concentrations. The secondary outcome was gastric coagulation. Other outcomes were  
90 serum glucose, insulin, free fatty acids (FFA) and triglyceride (TG) concentrations and  
91 appetite ratings (hunger, fullness, desire to eat, prospective consumption and thirst). The  
92 study was conducted according to the principles of the Declaration of Helsinki (October

93 2013) and registered with the Dutch Trial Register under number NL8137 (accessible through  
94 <https://trialssearch.who.int/Trial2.aspx?TrialID=NL-OMON28580>). All participants signed written  
95 informed consent.

96

## 97 **Sample size**

98 Sample size was calculated based on the primary outcomes, gastric emptying and post  
99 prandial AA profile. Given our previous work on gastric emptying of caloric liquids in adults,  
100 we know that the gastric emptying half time of 500 ml dairy-based shakes differing in energy  
101 density and viscosity (protein content either 6 or 30 g and energy density 0.2 kcal/ml or 1  
102 kcal/ml) has an overall gastric emptying half-time (GE-t50) of  $54.7 \pm 3.8$  min, with the  
103 different shakes ranging between  $26.5 \pm 3.0$  min and  $81.9 \pm 8.3$  min. The goat MC drink  
104 contains 0.58 kcal/ml. Based on nutrient density the expected SD of the cow MC and the  
105 goat MC drinks should be somewhere between 3 and 6. Therefore, we assumed an SD of 6  
106 min for both drinks. In Camps et al. 2016 the average difference in GE-t50 between a 500-ml  
107 thin and thick shake was 14.5 (low-calory) and 12.4 min (high-calory). For a 300-ml load the  
108 GE-t50 will be smaller. We considered a 4 min difference in gastric emptying half-time  
109 between the treatments as the minimum detectable difference. A two-sided test was  
110 deemed appropriate, with  $Z\alpha=1.96$ ,  $p=0.05$  and a power of 90% gives a  $Z\beta$  of 1.28. Combined  
111 with the SD of 6 this leads to the following formula for paired comparisons (Gogtay 2010):  $n$   
112  $= (1.96 + 1.28)^2 \times (6/4)^2 = (3.24)^2 \times 1.5 = 18$  participants.

113

114 To ensure sample size was sufficient for the other primary outcome, post prandial AA profile,  
115 a second sample size calculation was performed. The estimation for postprandial AA was



116 based on the peak value and the total free AA assessed in the serum after consumption of  
117 protein products. For the peak value, a difference of 100 µg/ml was regarded as relevant  
118 with an individual difference in peak values of 100 µg/ml (Farnfield, Trenergy et al. 2009, He,  
119 Spelbrink et al. 2013). Again we used a two-sided test, with  $Z\alpha=1.96$ ,  $p=0.05$  and power of  
120 90% gives a  $Z\beta=1.28$ . This leads to the following formula for paired comparisons:  $n = (1.96 +$   
121  $1.28)^2 \times (100/100)^2 = (3.24)^2 \times 1 = 11$  participants. Based on the above, we aimed to  
122 include 18 participants.

123

## 124 **Participants**

125 Healthy males were recruited from November 2019 until March 2020 via e-mail using a  
126 database of individuals who expressed interest in participating in scientific research.  
127 Healthy, non-smoking men with a BMI of 18.5-25 kg/m<sup>2</sup> were included. Exclusion criteria  
128 were cow or goat milk allergy or lactose intolerance (self-reported), gastric disorders or  
129 regular gastric complaints, use of proton pump inhibitors or other gastric medication, or a  
130 contra-indication to MRI scanning (including, but not limited to pacemakers and  
131 defibrillators, intraorbital or intraocular metallic fragments ferromagnetic implants or being  
132 claustrophobic). Eighteen healthy men (age  $23 \pm 1.6$  y, BMI  $23 \pm 1.6$  kg/m<sup>2</sup>) participated in  
133 the study. The flow diagram can be found in **Supplemental figure 1**.

134

## 135 **Treatments**

136 Treatments were 300 ml drinks containing 30 g of protein originating from cow micellar  
137 casein concentrate powder (FrieslandCampina Refit MCI80) or 30 g goat micellar casein  
138 concentrate powder (Ausnutria Dairy Corporation Ltd, pilot plant). The drinks were matched

139 on caloric content, protein, lactose and dry matter content. The amount of the AA leucine  
140 was equal. Vanilla extract was added to ensure similarity of taste. The drinks were prepared  
141 by slowly reconstituting the caseins at 50°C and thereafter allowing them to fully rehydrate  
142 at 4°C overnight using magnetic stirrer. This method assured a more similar viscosity in the  
143 drinks (when resolving fast by shaking there was a larger viscosity of the cow MC drink: 200-  
144 500 mPa.s and goat MC drink 8-15mPa.s). Three samples of each drink were measured with  
145 a rheometer to assess their viscosity using an Anton Paar Physica MCR 301 rheometer  
146 equipped with a Couette geometry with a volume of 1 ml. Viscosity was determined at  
147 constant shear rate of 100s<sup>-1</sup> at 20 °C. The difference in viscosity of the drinks (15.9 ± 3.9  
148 mPa.s for the cow MC drink and 7.2 ± 1.8 mPa.s for the goat MC drink) was deemed not  
149 physiologically relevant (for instance milk 's viscosity is 2 mPa.s while that of yoghurt is 150  
150 mPa.s which is a much larger difference).

151

152 The composition per 300 ml serving of the cow MC drink was 176 kcal, 30 g protein, 90:10  
153 casein to whey ratio, 12 g lactose, 0.77 g fat and 81 g dry matter. For the goat MC drink this  
154 was 174 kcal, 30 g protein, 90:10 casein to whey ratio, 12 g lactose, 0.60 g fat, 81 g dry  
155 matter. The amino acid profiles of the drinks can be found in **Table 1**. The data were  
156 analyzed by Qlip B.V. (lactose, dry matter, fat, protein) and NIZO (casein-to-whey ratio of the  
157 goat micellar casein concentrate; for cow micellar casein concentrate the 90:10 casein to  
158 whey ratio was stated on the product data sheet).

159

## 160 **Study procedures**

161 Participants arrived after an overnight fast. Eating was allowed until 8 PM on the day before  
162 the study. Drinking water was allowed up to one hour before the visit. Participants started  
163 their scan session at 8 or at 10 AM and were measured at the same time on both study days.  
164 First, a canula was placed in an antecubital vein. Then, participants verbally provided  
165 baseline appetite ratings after which the baseline MRI scan was performed and the baseline  
166 blood sample was drawn. Subsequently, they consumed one of the 300-ml drinks within two  
167 minutes. Participants were randomly allocated by block randomization using  
168 <https://randomizer.org> to receive either the cow or goat MC first. Participants were blind for  
169 which drink they received. Gastric MRI scans were performed at baseline and at t = 3, 10, 20,  
170 30, 40, 50 and 60 minutes after the start of ingestion. During the MRI session participants  
171 verbally rated hunger, fullness, prospective consumption, thirst and nausea on a scale from 0  
172 (not at all) to a 100 (most imaginable) at each time point (Noble, Clark et al. 2005, Blundell,  
173 de Graaf et al. 2010). An overview of a test session is given in **Figure 1**.

174

## 175 **MRI**

176 Participants were scanned in a supine position with the use of a 3 Tesla Siemens Verio MRI  
177 scanner (Siemens AG, Munich, Germany) using a T<sub>2</sub>-weighted spin echo sequence (HASTE, 24  
178 6-mm slices, 2.4 mm gap, 1.19 x 1.19 mm in-plane resolution, TR 850 ms, TE 87 ms, flip angle  
179 112 °C) with breath hold command on expiration to fixate the position of the diaphragm and  
180 the stomach. The duration of the scan was approximately 18 seconds. The software Medical  
181 Imaging Processing And Visualization (MIPAV, version 11.0.3) (McAuliffe, Lalonde et al. 2001)  
182 was used to manually delineate gastric content on each slice and create a corresponding

183 mask image. Gastric content volume on each time point was calculated by multiplying  
184 surface area of gastric content per slice with slice thickness including gap distance and  
185 summing up the volumes of all slices showing gastric content. In Matlab (version R2023a,  
186 *multitresh* function) a bias field correction was performed using multiplicative intrinsic  
187 component optimization (MICO) (Li, Gore et al. 2014). To assess changes in gastric  
188 coagulation, image texture analysis of the stomach content was performed using the masks  
189 in the software LIFEx (version 7.2.0, Institut national de la santé et de la recherche médicale,  
190 France) (Nioche, Orhac et al. 2018). Homogeneity, coarseness, contrast, and busyness were  
191 calculated. These image metrics provide information on the spatial patterns of voxel  
192 intensity (Thomas, Qin et al. 2019). The Gray-Level Co-occurrence Matrix (GLCM) method  
193 was used for homogeneity (degree of similarity between voxels) and Neighborhood Gray-  
194 level Difference Matrix (NGLDM) difference of grey-levels between one voxel and its 26  
195 neighbors in 8 dimensions was used for contrast (local variations), coarseness (spatial rate of  
196 change in intensity) and busyness (spatial frequency of changes in intensity). The number of  
197 grey-levels for texture metric calculation was set at 64, intensity rescaling at relative (ROI:  
198 min/max), and dimension processing at 2D. On each postprandial time point, texture metrics  
199 were calculated per slice for the stomach content. Subsequently, a weighted average texture  
200 metric was calculated based on the gastric content volume in each slice such that slices with  
201 little stomach content contributed less to the average than those with more stomach  
202 content. To quantify the (relative) volume of liquid and semi-solid stomach contents the  
203 number of lighter (more liquid), intermediate and darker (semi-solid) voxels was calculated  
204 by determining two intensity thresholds with the use of Otsu's method (Otsu 1979) in  
205 Matlab, an approach previously used on *in vitro* and *in vivo* MRI images of gastric milk  
206 digestion (Mayar, Smeets et al. 2023, van Eijnatten, Camps et al. 2023, Mayar, de Vries et al.

207 2024). The number of intermediate and darker voxels were summed and interpreted as  
208 reflecting voxels in which coagulation took place. This was done because visual inspection of  
209 the thresholding results using one threshold showed a poorer separation between lighter  
210 and darker gastric contents. In the context of this study, changes in image texture metrics  
211 were interpreted as reflecting changes in the degree of coagulation. An example of stomach  
212 contents with and without coagulation and the corresponding image texture metrics can be  
213 found in **Supplemental figure 2**.

214

### 215 **Blood parameters**

216 Blood samples were collected at baseline and at t = 15, 30, 60, 90, 120, 180 and 240 min in  
217 sodium-fluoride (for glucose), serum (for AA, FFA and insulin) and lithium-heparin (for  
218 triglyceride) tubes. After collection, blood in the serum tube was allowed to clot for 30  
219 minutes. Subsequently, all tubes were centrifuged at 1300 g for 10 minutes at 20 °C. After  
220 centrifugation, the supernatant was divided into aliquots and stored in a -80°C freezer until  
221 analysis. AA, FFA and insulin concentrations were measured at Wageningen University.  
222 Glucose and TG concentrations were measured at the clinical chemistry lab of the Gelderse  
223 Vallei hospital (Ede, The Netherlands).

224

225 AA concentrations were determined using triple quadrupole mass spectrometry (TQMS),  
226 with an internal standard and <sup>13</sup>C reference mix. Glucose concentrations were determined  
227 using an Atellica CH Glucose Hexokinase\_3 (GluH\_3) assay kit and Atellica CH analyzer  
228 (Siemens Healthineers, Netherlands). The lower limit of detection (LLOD) was 0.2 mmol/l  
229 and intra-assay CVs were at most 4.5%. Serum insulin concentrations were determined using

230 an enzymatic immunoassay kit (ELISA, Mercodia AB, Sweden) with a LLOD of 0.008 mmol/l  
231 and intra assay CVs of maximal 6.9%. Serum FFA concentrations were determined using an  
232 enzymatic assay kit (Instruchemie, Delfzijl) with a LLOD of 4 mg/dl and intra assay CVs of at  
233 most 1.4%. TG concentrations were quantified using an Atellica CH TG enzymatic assay kit  
234 and quantified using an Atellica CH analyzer (Siemens Healthineers, Netherlands) with a  
235 LLOD of 8 mg/dl and intra assay CVs of at most 1.0%.

236

### 237 **Statistical analysis**

238 In order to estimate GE-t50, a commonly used summary measure, a curve was fitted to the  
239 gastric volume over time of the cow MC and goat MC drink using R statistical software  
240 according to the linear-exponential model as developed on the basis of earlier models  
241 (Elashoff, Reedy et al. 1982, Fruehauf, Menne et al. 2011). Further analyses were performed  
242 in SPSS (version 22, IBM, Armonk, USA). Essential amino acid (EAA), non-essential amino acid  
243 (NEAA) and branched-chain amino acid (BCAA) concentrations were calculated by adding  
244 individual AA concentrations. GE-t50 was compared between cow MC and goat MC drink  
245 with a paired t-test. Normality was confirmed by inspecting QQ plots of the residuals. Overall  
246 gastric volume, coagulation (image texture of the gastric contents as reflected in  
247 homogeneity, contrast, coarseness and busyness), blood parameters and appetite ratings  
248 over time were tested using linear mixed models with treatment, time and treatment\*time  
249 as fixed factors and baseline values as covariate. Post-hoc t-tests were performed with  
250 Tukey's HSD correction when there were significant effects. In addition, Pearson correlation  
251 coefficients were calculated for the associations between image texture metrics at 30 min  
252 (chosen because that was the first time point that coagulation was clearly visible) and GE-t50

253 and blood parameters (4-h AUC of EAA, NEAA, BCAA, glucose and insulin). The significance  
254 threshold was set at  $p = 0.05$ . Data are expressed as mean  $\pm$  SEM unless stated otherwise.

255

## 256 **RESULTS**

### 257 **Gastric emptying**

258 The curves of gastric emptying over time of the cow MC and goat MC drink is shown in  
259 **Figure 2**. Gastric emptying half-time was  $84.6 \pm 23.7$  minutes for the cow MC drink,  
260 compared to  $79.8 \pm 24.7$  minutes for the goat MC drink ( $p = 0.395$ ). The mixed model  
261 analysis showed no difference in gastric emptying over time between the drinks (MD 0.77,  
262 95% CI [-6.9, 8.5],  $p = 0.845$ ) and there was no time\*treatment interaction effect ( $p = 0.65$ ).  
263 There was a significant effect of time ( $p < 0.001$ ).

264

265 An example of a thresholded stomach image can be found in **Supplemental figure 3**. The  
266 percentage of liquid and coagulum volume did not differ between the cow MC and goat MC  
267 drink over time (coagulum: MD 0.407 %, 95 % CI [-1.2, 2.0],  $p = 0.607$ ) and there was no  
268 treatment\*time interaction effect ( $p = 0.52$ ). There was a significant decrease in coagulum  
269 volume over time (time effect  $p = 0.002$ ).

270

### 271 **Amino acids**

272 Figures of serum EAA, NEAA and BCAA can be found in **Figure 3**. Figures of all individual AAs  
273 can be found in **Supplemental figure 4 and 5**. Serum concentration of EAA over time was  
274 lower for goat MC (MD  $-110 \mu\text{mol/L}$ , 95% CI [-162, -58],  $p < 0.001$ ). Post-hoc t-test showed  
275 that this was driven by time points  $t = 30$  ( $p = 0.002$ ) and  $t = 180$  ( $p = 0.025$ ) and that there

276 tended to be a lower serum concentration of NEAA for goat MC over time (MD -62.1  $\mu\text{mol/L}$ ,  
277 95% CI [-127, 3.4],  $p = 0.063$ ), driven by time point  $t = 180$  min ( $p = 0.045$ ). Serum  
278 concentration of BCAA was also lower for goat MC (MD -65  $\mu\text{mol/L}$ , 95% CI [-101, -29],  $p <$   
279 0.001). This was driven by time point  $t = 30$  ( $p = 0.005$ ), and there was a trend at  $t = 180$  ( $p =$   
280 0.051). Time effects were significant for EAA, NEAA and BCAA ( $p < 0.001$ ). There were no  
281 interaction effects.

282

### 283 **Coagulation**

284 **Figure 4** shows examples of MRI images at the level of the stomach showing homogenous  
285 stomach content after casein drink consumption and subsequent coagulum formation.

286

287 The curves of the image texture metric contrast of the stomach content over time can be  
288 found in **Figure 5**. The other image texture metrics can be found in **Supplemental figure 6**.

289 Contrast was significantly lower for the cow MC than for the goat MC drink (MD 0.010, 95%  
290 CI [0.001, 0.020],  $p = 0.036$ ). Homogeneity (MD -0.003, 95% CI [-0.012, 0.006],  $p = 0.503$ ),  
291 coarseness (MD 0.001, 95% CI [0.000, 0.001],  $p = 0.310$ ) and busyness (MD -0.008, 95% CI [-  
292 0.023, 0.007],  $p = 0.315$ ) were not significantly different between the drinks. Time effects  
293 were significant for all texture metrics (all  $p < 0.001$ ). There were no interaction effects.

294

### 295 **Glucose and insulin**

296 Overall, glucose concentrations did not differ between the drinks (MD -0.055  $\text{mmol/L}$ , 95%  
297 CI [-0.14, 0.028],  $p = 0.19$ ). Only when examining specific timepoints, glucose concentration



298 for the goat MC drink was slightly higher compared to the cow MC drink at t = 30 minutes  
299 (MD 0.015 mmol/L, 95% CI [0.42, 0.22], p=0.036). Insulin concentrations did not differ  
300 between the cow MC and goat MC drinks (MD -1.66 mIU/L, 95% CI [1.35, -0.16], p = 0.84)  
301 (see **Supplemental figure 7**). Time effects were significant for glucose and insulin (p <  
302 0.001). There were no interaction effects.

303

#### 304 **Triglycerides and free fatty acids**

305 FFA concentrations were not different between the cow MC and goat MC drinks (MD -0.032  
306 mmol/L, 95% CI [0.034, 0.001], p = 0.948). TG concentrations over time were significantly  
307 higher for goat MC (MD 0.074 mmol/L, 95% CI [0.039, 0.109], p = 0.009), even with baseline  
308 differences as a covariate in the mixed model analysis. However, there were no differences  
309 for any of the time points (see **Supplemental figure 8**). Time effects were significant for FFA  
310 and TG (p < 0.001) and there were no interaction effects.

311

#### 312 **Appetite ratings**

313 Hunger and thirst did not differ between the treatments (p = 0.61 and 0.29, respectively).  
314 Fullness, desire to eat and prospective consumption were significantly lower after goat MC  
315 ingestion (p = 0.036, p < 0.001, p < 0.001, respectively). However, as can be seen in  
316 **Supplemental figure 9**, the differences are small (below 10 units as a mean difference over  
317 time).

318

### 319 **Correlations between image texture metrics, blood concentrations and gastric emptying**

320 To explore the associations between image texture metrics as an indicator of the degree of  
321 coagulation, blood concentrations and gastric emptying, Pearson correlation coefficients  
322 were calculated for image texture metrics at 30 min (because at t=30 min coagulation was  
323 visible) and 4-h AUC of blood parameters (EAA, NEAA, BCAA, glucose and insulin). Overall,  
324 GE-t50 correlated negatively with contrast ( $r=-0.413$ , 95% CI [-0.662, -0.081]) and coarseness  
325 ( $r=-0.38$ , 95% CI [-0.640, -0.043]). NEAA correlated with insulin ( $r=0.491$ , 95% CI [0.152,  
326 0.727]). When divided between treatments: goat MC, EAA, NEAA and BCAA were negatively  
327 correlated with coarseness ( $r=-0.698$ , 95% CI [-0.887, -0.175],  $r=-0.572$ , 95% CI [-0.837, -  
328 0.002] and  $r = -0.690$ , 95% CI [-0.891, -0.162] respectively). GE-t50 was positively correlated  
329 with insulin ( $r = 0.558$ , 95% CI [0.130, 0.790]). For cow MC GE-t50 was positively correlated  
330 with image homogeneity and busyness ( $r = 0.498$ , 95% CI [0.061, 0.760] and  $r = 0.568$ , 95% CI  
331 [0.141, 0.787] respectively) and negatively correlated with contrast and coarseness ( $r = -$   
332  $0.627$ , 95% CI [-0.822, -0.217] and  $r = -0.554$ , 95% CI [-0.780, -0.134]). All correlations can  
333 be found in **Supplemental figure 10**.

334

### 335 **DISCUSSION**

336 This is the first study to explore digestion of cow and goat MC by quantifying gastric  
337 emptying, gastric casein coagulation and blood concentrations in humans. Overall, serum  
338 concentrations of EAA and BCAA were higher for cow MC. Gastric emptying curves and  
339 gastric emptying half-time (GE-t50) were similar for the cow MC and goat MC drinks. The  
340 image texture metric contrast was significantly different, suggesting a difference in

341 coagulation. No significant differences between cow MC and goat MC were seen for serum  
342 insulin, glucose and FFA concentrations. Serum TG concentrations were significantly higher  
343 in goat MC.

344

345 Coagulation was visible on the MRI scans for both drinks (see Figure 4). In an attempt to  
346 objectively quantify this, image texture metrics were calculated for the stomach contents. A  
347 lower homogeneity and higher contrast could reflect 'more' coagulation. Even though the  
348 actual meaning of differences in image texture metrics in reference to coagulating  
349 properties of stomach content requires more research, the difference in the metric  
350 'contrast' does support the notion of a difference in coagulation between cow MC and goat  
351 MC. However, the metrics homogeneity, coarseness and busyness did not differ between  
352 the drinks. It should be taken into account that higher homogeneity could not only reflect a  
353 more homogenous liquid, but also the presence of a large and fairly homogenous coagulum.  
354 Another aspect to consider is that not only the size, but also the structure is an important  
355 characteristic of coagulates. For instance, some coagulates can be firm and have a greater  
356 weight and denser structure than less dense coagulates with approximately the same  
357 volume (Wang, Ye et al. 2018). Image texture metrics could possibly be used to quantify the  
358 density of the coagulum, as MRI can reflect the water content of the coagulum. Notably, MRI  
359 image texture parameters are affected by the resolution of the input images and could  
360 detect differences in image intensity patterns not appreciable by eye. This requires further  
361 validation by concomitant analysis of MRI images and coagulates that differ in size and  
362 density. To provide molecular-level information, other MRI techniques are being developed  
363 such as measurement of the magnetization transfer ratio and relaxation rates (Deng, Seimys  
364 et al. 2022, Deng, Mars et al. 2023, Mayar, Smeets et al. 2023, Mayar, de Vries et al. 2024).

365 These measurements require additional MRI measurements to be recorded, but could be  
366 used in follow-up research to examine more subtle differences in protein coagulation *in vivo*.

367

368 Cow MC and goat MC coagulates likely differ, since *in vitro* and animal *in vivo* research  
369 showed that goat milk coagulum had a softer consistency and less fused protein networks,  
370 especially toward a later stage of digestion (Ye, Liu et al. 2019, Roy, Moughan et al. 2022) .  
371 We therefore hypothesized that this would lead to a longer gastric retention of coagulum  
372 and relatively faster GE for goat milk casein in comparison to cow milk casein. This is seen in  
373 recent human *in vivo* work (van Eijnatten, Roelofs et al. 2024). However, we observed that  
374 the overall GE was similar and the emptying of coagulum and liquid volume fraction did not  
375 differ between cow MC and goat MC. This is in line with recent findings that bovine milk  
376 coagulation differences did not affect GE, and GE did not explain differences in AA  
377 concentrations (Milan, Barnett et al. 2024).

378

379 As expected, even though AA composition of the treatments were largely similar,  
380 postprandial serum AA concentrations differed between casein derived from goat and cow  
381 milk, which appears to be due in part to differences in their coagulation. Goat milks' softer  
382 and smaller coagulates (Park 2017) would make the proteins more accessible to digestive  
383 enzymes (proteases) and lead to more efficient break down of peptide bonds such that goat  
384 milk proteins would be faster digested than cow milk proteins (Almaas, Cases et al. 2006).  
385 However, our study showed a higher total response of serum AA in the 5 hours after cow  
386 milk consumption, which seems contradictory. On the other hand, in an *in vitro* study of  
387 Inglingstad et al., who used a two-step digestion model (gastric and duodenal), caseins from

388 goat milk were less digested compared to caseins from cow milk during gastric digestion  
389 (Inglingstad, Devold et al. 2010). Interestingly, in our study serum EAA concentrations were  
390 higher for cow MC, while we expected higher concentrations for goat MC based on *in vitro*  
391 studies (Almaas, Cases et al. 2006, Zhang, Liu et al. 2023). However, we examined caseins in  
392 relative isolation where milk fat content was negligible and the mineral profile was different  
393 than in the casein micelles present in whole milk. The formation of coagulates interacts with  
394 minerals and fat and thus coagulation might be different for a whole food (i.e. in the 'food  
395 matrix', (Aguilera 2019)). For instance, the interaction of peptides with small fat globules can  
396 slow protein breakdown and thereby influence AA availability (Le Feunteun, Barbé et al.  
397 2014, Tunick, Ren et al. 2016). A second factor leading to differences in coagulation might be  
398 the difference in buffering capacity between cow and goat milk. Goat milk contains a higher  
399 non-protein nitrogen (NPN) amount than cow milk and more NPN contributes to a slower  
400 acidification in the stomach (Park 1991). Roy et al also discuss the high degree of variation in  
401 casein micelle characteristics within the same species (Roy, Moughan et al. 2022). Within  
402 and across species differences in breeds, genetic variants, and phosphorylation sites of the  
403 caseins may also add to the variation (Crowley, Kelly et al. 2017). In summary, to our  
404 knowledge three factors could have contributed to the discrepancies of our study with other  
405 studies: 1) the fact that this is the first human *in vivo* study on gastric digestion, 2) that we  
406 assessed casein outside of the food matrix, 3) the buffering capacity and the variation in  
407 casein characteristics even within species.

408

409 Fullness, desire to eat and prospective consumption were significantly lower for goat MC,  
410 but these differences were small. For instance, the mean difference of desire to eat had a  
411 mean difference of 7 pts over the 60 measured minutes. A difference below 10% is usually

412 not considered as practically relevant (Flint, Raben et al. 2000). Thus, this finding is in line  
413 with the lack of differences in gastric volume over time and coagulum volume over time  
414 between the drinks.

415

416 We here focused on the casein fractions from cow and goat milk, to be able to study casein  
417 coagulation in the absence of interaction effects. Future research should explore casein  
418 coagulation within a food matrix, as this could significantly influence protein digestion,  
419 involving interactions with components like fat (Cecchinato, Penasa et al. 2012).

420

421 In conclusion, cow MC and goat MC show a difference in coagulation as inferred by AA  
422 concentrations and supported by image texture analysis *in vivo* in humans. This difference in  
423 coagulation did not influence overall gastric emptying or the emptied fraction of the liquid  
424 and coagulum volume. Therefore, gastric emptying was not the main driver of AA  
425 differences. This warrants further research to examine differences in casein coagulation *in*  
426 *vivo* in the food matrix and how this may affect digestion of milk products, such as infant  
427 formula or medical nutrition. This may help to determine the optimal use for cow and goat  
428 milk and their protein fractions.

429

#### 430 **ACKNOWLEDGEMENTS**

431 EE, GC, WR and PS designed the research; EE conducted the research. EE analysed the data  
432 and drafted the paper. GC, WR, LP and PS revised the manuscript critically for important  
433 intellectual content. PS had primary responsibility for final content. All authors read and

434 approved the final manuscript. This study was funded by Ausnutria Dairy Corporation Ltd  
435 and WR and LP were employed by Ausnutria Dairy Corporation Ltd. All other authors declare  
436 no further conflict of interest. We thank Julia Roelofs, Mireille Schipper, Jip Jordaan and Lisa  
437 van den Berg for assisting with data collection and Jacques Vervoort and Sebas Wesseling for  
438 the amino acid analysis. The use of the 3T MRI was made possible by WUR Shared Research  
439 Facilities.

## REFERENCES

- Aguilera, J. M. (2019). "The food matrix: implications in processing, nutrition and health." Critical Reviews in Food Science and Nutrition **59**(22): 3612-3629.
- Almaas, H., A.-L. Cases, T. G. Devold, H. Holm, T. Langsrud, L. Aabakken, T. Aadnoey and G. E. Vegarud (2006). "In vitro digestion of bovine and caprine milk by human gastric and duodenal enzymes." International Dairy Journal **16**(9): 961-968.
- Atherton, P. J. and K. Smith (2012). "Muscle protein synthesis in response to nutrition and exercise." The Journal of physiology **590**(5): 1049-1057.
- Blundell, J., C. de Graaf, T. Hulshof, S. Jebb, B. Livingstone, A. Lluch, D. Mela, S. Salah, E. Schuring, H. van der Knaap and M. Westerterp (2010). "Appetite control: methodological aspects of the evaluation of foods." Obes Rev **11**(3): 251-270.
- Ceballos, L. S., E. R. Morales, G. de la Torre Adarve, J. D. Castro, L. P. Martínez and M. R. S. Sampelayo (2009). "Composition of goat and cow milk produced under similar conditions and analyzed by identical methodology." Journal of Food Composition and Analysis **22**(4): 322-329.
- Cecchinato, A., M. Penasa, C. Cipolat Gotet, M. De Marchi and G. Bittante (2012). "Short communication: Factors affecting coagulation properties of Mediterranean buffalo milk." Journal of Dairy Science **95**(4): 1709-1713.
- Claeys, W. L., C. Verraes, S. Cardoen, J. De Block, A. Huyghebaert, K. Raes, K. Dewettinck and L. Herman (2014). "Consumption of raw or heated milk from different species: An evaluation of the nutritional and potential health benefits." Food Control **42**: 188-201.
- Crowley, S. V., A. L. Kelly, J. A. Lucey and J. A. O'Mahony (2017). "Potential Applications of Non-Bovine Mammalian Milk in Infant Nutrition." Handbook of Milk of Non-Bovine Mammals: 625-654.
- Deng, R., M. Mars, A. E. M. Janssen and P. A. M. Smeets (2023). "Gastric digestion of whey protein gels: A randomized cross-over trial with the use of MRI." Food Hydrocolloids **141**: 108689.
- Deng, R., A. Seimys, M. Mars, A. E. M. Janssen and P. A. M. Smeets (2022). "Monitoring pH and whey protein digestion by TD-NMR and MRI in a novel semi-dynamic in vitro gastric simulator (MR-GAS)." Food Hydrocolloids **125**: 107393.
- Do, Q. N., M. A. Lewis, A. J. Madhuranthakam, Y. Xi, A. A. Bailey, R. E. Lenkinski and D. M. Twickler (2019). "Texture analysis of magnetic resonance images of the human placenta throughout gestation: A feasibility study." PloS one **14**(1): e0211060-e0211060.
- Eijnatten, E. J. M. v., J. J. M. Roelofs, G. Camps, T. Huppertz, T. T. Lambers and P. A. M. Smeets (2023). "Gastric coagulation and postprandial amino acid absorption of milk is affected by mineral composition: a randomized crossover trial." medRxiv: 2023.2009.2013.23295475.
- Elashoff, J. D., T. J. Reedy and J. H. Meyer (1982). "Analysis of gastric emptying data." Gastroenterology **83**(6): 1306-1312.
- Fardet, A., D. Dupont, L.-E. Rioux and S. L. Turgeon (2019). "Influence of food structure on dairy protein, lipid and calcium bioavailability: A narrative review of evidence." Critical Reviews in Food Science and Nutrition **59**(13): 1987-2010.
- Farnfield, M. M., C. Trenerry, K. A. Carey and D. Cameron-Smith (2009). "Plasma amino acid response after ingestion of different whey protein fractions." International Journal of Food Sciences and Nutrition **60**(6): 476-486.
- Flint, A., A. Raben, J. E. Blundell and A. Astrup (2000). "Reproducibility, power and validity of visual analogue scales in assessment of appetite sensations in single test meal studies." International Journal of Obesity **24**(1): 38-48.
- Fruehauf, H., D. Menne, M. A. Kwiatek, Z. Forras-Kaufman, E. Kaufman, O. Goetze, M. Fried, W. Schwizer and M. Fox (2011). "Inter-observer reproducibility and analysis of gastric volume measurements and gastric emptying assessed with magnetic resonance imaging." Neurogastroenterol Motil **23**(9): 854-861.
- Gogtay, N. J. (2010). "Principles of sample size calculation." Indian J Ophthalmol **58**(6): 517-518.



He, T., R. E. J. Spelbrink, B. J. Witteman and M. L. F. Giuseppin (2013). "Digestion kinetics of potato protein isolates in vitro and in vivo." International Journal of Food Sciences and Nutrition **64**(7): 787-793.

Hettinga, K., L. Pellis, W. Rombouts, X. Du, G. Grigorean and B. Lönnerdal (2023). "Effect of pH and protein composition on proteolysis of goat milk proteins by pepsin and pancreatin." Food Research International **173**: 113294.

Hodgkinson, A. J., O. A. M. Wallace, I. Boggs, M. Broadhurst and C. G. Prosser (2018). "Gastric digestion of cow and goat milk: Impact of infant and young child in vitro digestion conditions." Food chemistry **245**: 275-281.

Huppertz, T. and L. W. Chia (2021). "Milk protein coagulation under gastric conditions: A review." International Dairy Journal **113**: 104882.

Ingham, B., A. Smialowska, N. M. Kirby, C. Wang and A. J. Carr (2018). "A structural comparison of casein micelles in cow, goat and sheep milk using X-ray scattering." Soft Matter **14**(17): 3336-3343.

Inglingstad, R. A., T. G. Devold, E. K. Eriksen, H. Holm, M. Jacobsen, K. H. Liland, E. O. Rukke and G. E. Vegarud (2010). "Comparison of the digestion of caseins and whey proteins in equine, bovine, caprine and human milks by human gastrointestinal enzymes." Dairy science & technology **90**(5): 549-563.

Lagrange, V., D. Whitsett and C. Burris (2015). "Global Market for Dairy Proteins." Journal of Food Science **80**(S1): A16-A22.

Le Feunteun, S., F. Barbé, D. Rémond, O. Ménard, Y. Le Gouar, D. Dupont and B. Laroche (2014). "Impact of the Dairy Matrix Structure on Milk Protein Digestion Kinetics: Mechanistic Modelling Based on Mini-pig In Vivo Data." Food and Bioprocess Technology **7**(4): 1099-1113.

Li, C., J. C. Gore and C. Davatzikos (2014). "Multiplicative intrinsic component optimization (MICO) for MRI bias field estimation and tissue segmentation." Magn Reson Imaging **32**(7): 913-923.

Maathuis, A., R. Havenaar, T. He and S. Bellmann (2017). "Protein Digestion and Quality of Goat and Cow Milk Infant Formula and Human Milk Under Simulated Infant Conditions." J Pediatr Gastroenterol Nutr **65**(6): 661-666.

Mahé, S., N. Roos, R. Benamouzig, L. Davin, C. Luengo, L. Gagnon, N. Gaussergès, J. Rautureau and D. Tomé (1996). "Gastrojejunal kinetics and the digestion of [15N]beta-lactoglobulin and casein in humans: the influence of the nature and quantity of the protein." The American Journal of Clinical Nutrition **63**(4): 546-552.

Mayar, M., M. de Vries, P. Smeets, J. van Duynhoven and C. Terenzi (2024). "MRI assessment of pH and coagulation during semi-dynamic in vitro gastric digestion of milk proteins." Food Hydrocolloids **152**: 109866.

Mayar, M., P. Smeets, J. van Duynhoven and C. Terenzi (2023). "In vitro 1H MT and CEST MRI mapping of gastro-intestinal milk protein breakdown." Food Structure **36**: 100314.

McAuliffe, M. J., F. M. Lalonde, D. McGarry, W. Gandler, K. Csaky and B. L. Trus (2001). Medical Image Processing, Analysis and Visualization in clinical research. Proceedings 14th IEEE Symposium on Computer-Based Medical Systems. CBMS 2001.

Milan, A. M., M. P. G. Barnett, W. C. McNabb, N. C. Roy, S. Coutinho, C. L. Hoad, L. Marciani, S. Nivins, H. Sharif, S. Calder, P. Du, A. A. Gharibans, G. O'Grady, K. Fraser, D. Bernstein, S. M. Rosanowski, P. Sharma, A. Shrestha and R. F. Mithen (2024). "The impact of heat treatment of bovine milk on gastric emptying and nutrient appearance in peripheral circulation in healthy females: a randomized controlled trial comparing pasteurized and ultra-high temperature milk." Am J Clin Nutr.

Miller, B. A. and C. D. Lu (2019). "Current status of global dairy goat production: an overview." Asian-Australas J Anim Sci **32**(8): 1219-1232.

Mulet-Cabero, A.-I., A. R. Mackie, P. J. Wilde, M. A. Fenelon and A. Brodkorb (2019). "Structural mechanism and kinetics of in vitro gastric digestion are affected by process-induced changes in bovine milk." Food hydrocolloids **86**: 172-183.

Nioche, C., F. Orhac, S. Boughdad, S. Reuzé, J. Goya-Outi, C. Robert, C. Pellot-Barakat, M. Soussan, F. Frouin and I. Buvat (2018). "LIFEx: A Freeware for Radiomic Feature Calculation in Multimodality

Imaging to Accelerate Advances in the Characterization of Tumor Heterogeneity." Cancer Research **78**(16): 4786.

Noble, B., D. Clark, M. Meldrum, H. Ten Have, J. Seymour, M. Winslow and S. Paz (2005). "The measurement of pain, 1945-2000." Journal of Pain and Symptom Management **29**(1): 14-21.

Otsu, N. (1979). "A Threshold Selection Method from Gray-Level Histograms." IEEE Transactions on Systems, Man, and Cybernetics **9**(1): 62-66.

Park, Y. W. (1991). "Relative Buffering Capacity of Goat Milk, Cow Milk, Soy-Based Infant Formulas, and Commercial Nonprescription Antacid Drugs<sup>1, 2</sup>." Journal of Dairy Science **74**(10): 3326-3333.

Park, Y. W. (2017). Goat Milk – Chemistry and Nutrition. Handbook of Milk of Non-Bovine Mammals: 42-83.

Roy, D., P. J. Moughan, A. Ye, S. M. Hodgkinson, N. Stroebinger, S. Li, A. C. Dave, C. A. Montoya and H. Singh (2022). "Structural changes during gastric digestion in piglets of milk from different species." Journal of Dairy Science.

Thomas, R., L. Qin, F. Alessandrino, S. P. Sahu, P. J. Guerra, K. M. Krajewski and A. Shinagare (2019). "A review of the principles of texture analysis and its role in imaging of genitourinary neoplasms." Abdom Radiol (NY) **44**(7): 2501-2510.

Trommelen, J., M. E. G. Weijzen, J. van Kranenburg, R. A. Ganzevles, M. Beelen, L. B. Verdijk and L. J. C. van Loon (2020). "Casein Protein Processing Strongly Modulates Post-Prandial Plasma Amino Acid Responses In Vivo in Humans." Nutrients **12**(8).

Tunick, M. H., D. X. Ren, D. L. Van Hekken, L. Bonnaillie, M. Paul, R. Kwoczak and P. M. Tomasula (2016). "Effect of heat and homogenization on in vitro digestion of milk." Journal of Dairy Science **99**(6): 4124-4139.

van Eijnatten, E. J. M., G. Camps, M. Guerville, V. Fogliano, K. Hettinga and P. A. M. Smeets (2023). "Milk coagulation and gastric emptying in women experiencing gastrointestinal symptoms after ingestion of cow's milk." Neurogastroenterology & Motility n/a(n/a): e14696.

van Eijnatten, E. J. M., J. J. M. Roelofs, G. Camps, T. Huppertz, T. T. Lambers and P. A. M. Smeets (2024). "Gastric coagulation and postprandial amino acid absorption of milk is affected by mineral composition: a randomized crossover trial." Food Funct **15**(6): 3098-3107.

van Vliet, S., N. A. Burd and L. J. van Loon (2015). "The Skeletal Muscle Anabolic Response to Plant-versus Animal-Based Protein Consumption." The Journal of Nutrition **145**(9): 1981-1991.

Wang, X., A. Ye, Q. Lin, J. Han and H. Singh (2018). "Gastric digestion of milk protein ingredients: Study using an in vitro dynamic model." Journal of Dairy Science **101**(8): 6842-6852.

Ye, A., J. Cui, E. Carpenter, C. Prosser and H. Singh (2019). "Dynamic in vitro gastric digestion of infant formulae made with goat milk and cow milk: Influence of protein composition." International Dairy Journal **97**: 76-85.

Ye, A., W. Liu, J. Cui, X. Kong, D. Roy, Y. Kong, J. Han and H. Singh (2019). "Coagulation behaviour of milk under gastric digestion: Effect of pasteurization and ultra-high temperature treatment." Food Chemistry **286**: 216-225.

Zhang, J., D. Liu, Y. Xie, J. Yuan, K. Wang, X. Tao, Y. Hemar, J. M. Regenstein, X. Liu and P. Zhou (2023). "Gastrointestinal digestibility of micellar casein dispersions: Effects of caprine vs bovine origin, and partial colloidal calcium depletion using in vitro digestion models for the adults and elderly." Food Chemistry **416**: 135865.

## FIGURE LEGENDS

**Figure 1.** Overview of a test session

**Figure 2.** Mean  $\pm$  SEM gastric content volume over time for the 300 ml cow (cow MC) and goat (goat MC) and milk-derived casein drinks. T=0 min is the start of ingestion. A linear mixed model analysis showed no significant difference between the drinks.

**Figure 3.** Mean concentration  $\pm$  SD of (A) serum essential amino acid, (B) non-essential amino acid and (C) branch-chained amino acid concentrations after cow (cow MC) and goat (goat MC) milk-derived casein drink ingestion. \* $p < 0.05$  placed at the right of the graph denotes a significant treatment effect. Above a data point it denotes a significant time point (post-hoc t-test).

**Figure 4.** Examples of T<sub>2</sub>-weighted MRI images showing cross-sections through an empty stomach after an overnight fast (baseline) and after 300 ml casein drink consumption. At t = 30 and 60 min coagulation can be observed.

**Figure 5.** Mean  $\pm$  SEM of the image texture metric contrast calculated over the stomach content over time after cow (cow MC) and goat (goat MC) milk-derived casein drink ingestion. A linear mixed model analysis showed a significant higher contrast of goat MC ( $p = 0.036$ ) driven by t = 40 min as seen with a post hoc t-test. A higher contrast reflects a greater degree of structure in the image, which we interpret as a difference in coagulation.

**TABLE****Table 1.** *Amino acid profile of cow and goat milk-derived casein drinks (g AA per 300 ml)*

| <b>AA type</b>                                    | <b>Amino acid</b> | <b>Cow milk-derived casein drink</b> | <b>Goat milk-derived casein drink</b> |
|---------------------------------------------------|-------------------|--------------------------------------|---------------------------------------|
| <b>Essential</b>                                  | Isoleucine        | 1.58                                 | 1.49                                  |
|                                                   | Leucine           | 2.96                                 | 2.96                                  |
|                                                   | Valine            | 1.61                                 | 1.60                                  |
|                                                   | Histidine         | 0.93                                 | 0.85                                  |
|                                                   | Lysine            | 2.60                                 | 2.61                                  |
|                                                   | Methionine        | 0.87                                 | 0.80                                  |
|                                                   | Phenylalanine     | 1.61                                 | 1.60                                  |
|                                                   | Threonine         | 1.33                                 | 1.45                                  |
|                                                   | Tryptophan        | 0.41                                 | 0.43                                  |
| Total                                             |                   | 13.9                                 | 13.8                                  |
| <b>Non-essential (or conditionally essential)</b> | Arginine          | 1.14                                 | 0.89                                  |
|                                                   | Cysteine          | 0.19                                 | 0.25                                  |
|                                                   | Glutamine         | 6.86                                 | 6.24                                  |
|                                                   | Glycine           | 0.58                                 | 0.50                                  |
|                                                   | Proline           | 3.47                                 | 3.76                                  |
|                                                   | Tyrosine          | 1.68                                 | 1.30                                  |
|                                                   | Alanine           | 0.98                                 | 0.94                                  |
|                                                   | Asparagine        | 2.24                                 | 2.19                                  |
|                                                   | Hydroxyproline    | <0.05                                | <0.05                                 |
|                                                   | Ornithine         | <0.05                                | <0.05                                 |
|                                                   | Serine            | 1.78                                 | 1.50                                  |
| Total                                             |                   | 18.9                                 | 17.6                                  |

<sup>1</sup>*Analysis was performed by Eurofins Analytico B.V. (Zwolle, the Netherlands)*

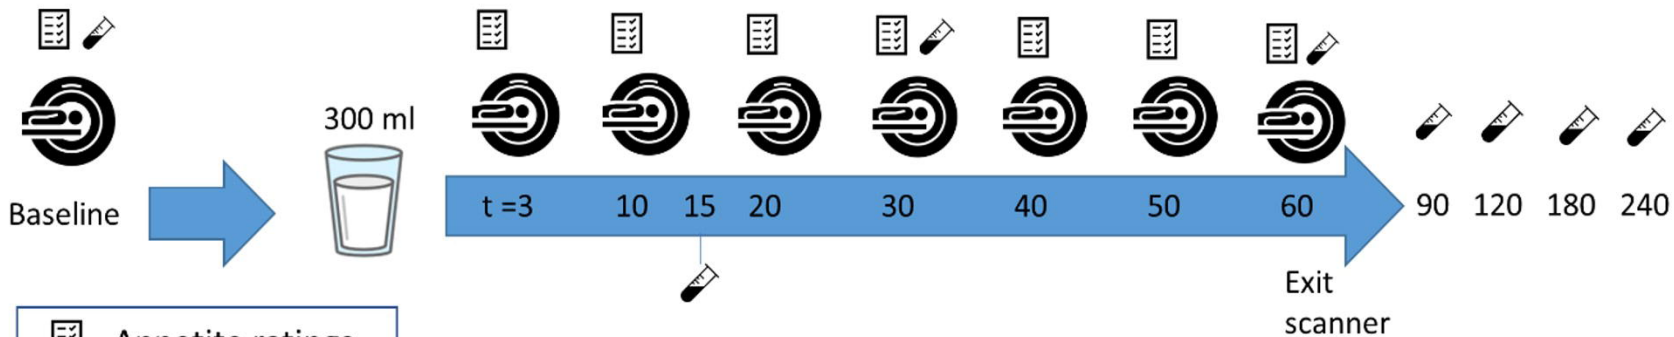

|                                                                                   |                  |
|-----------------------------------------------------------------------------------|------------------|
|  | Appetite ratings |
|  | Blood draw       |
|  | MRI scan         |

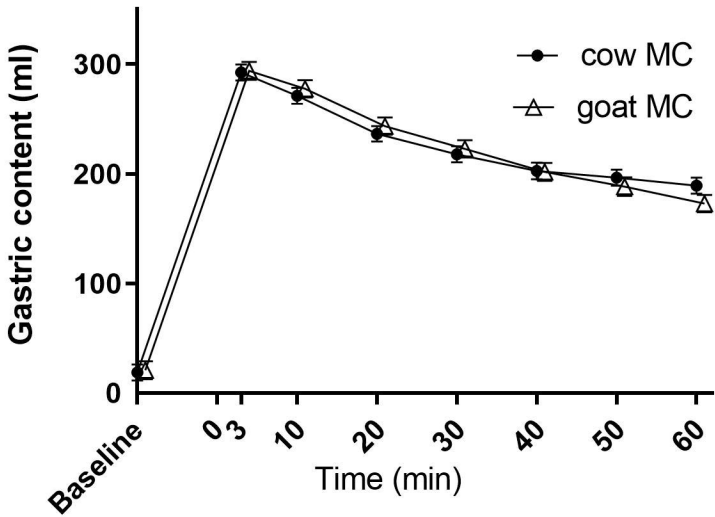

**A**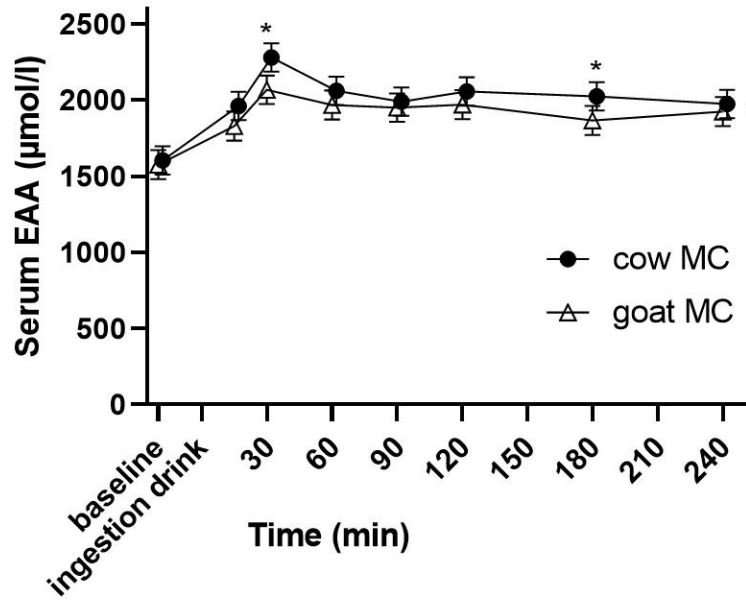**B**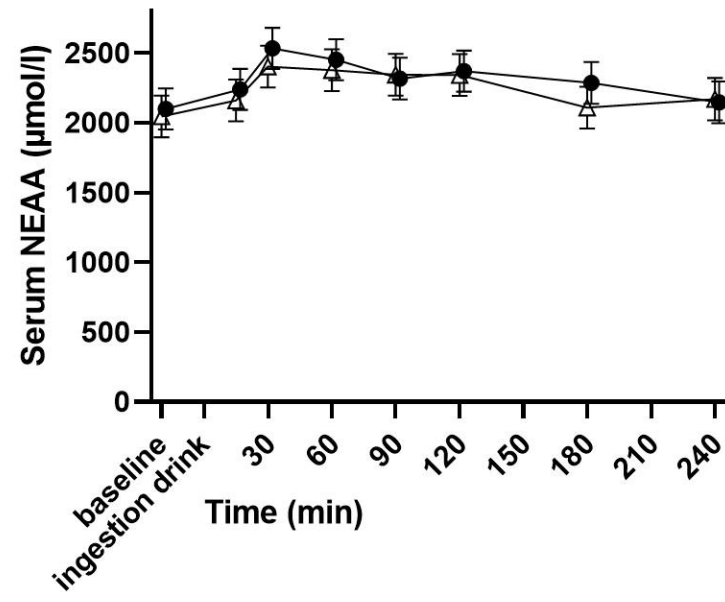**C**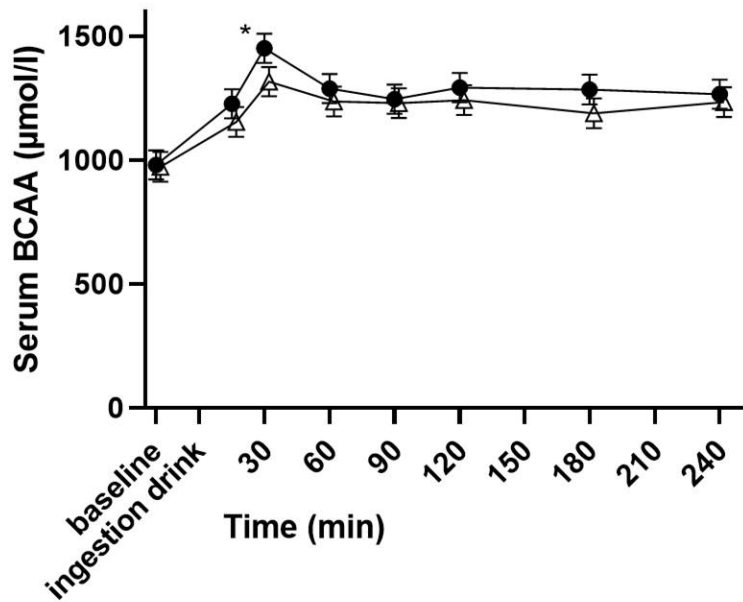

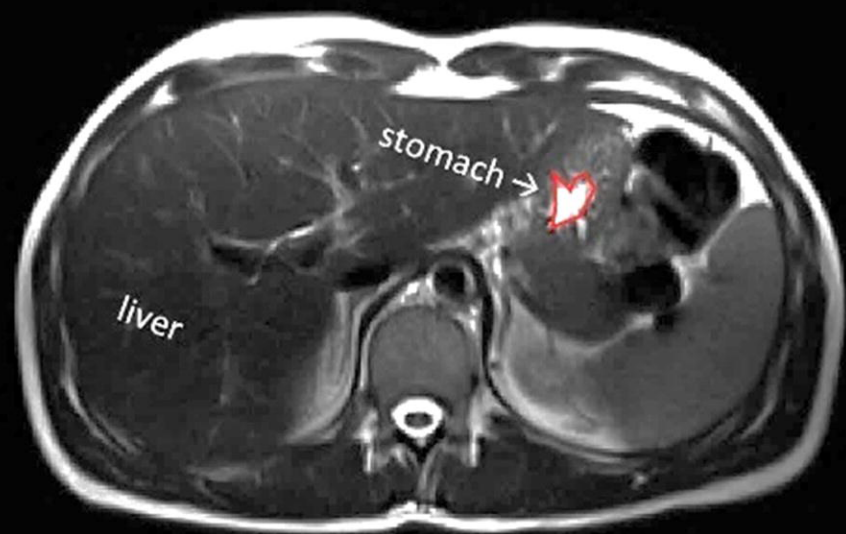

Baseline (fasted)

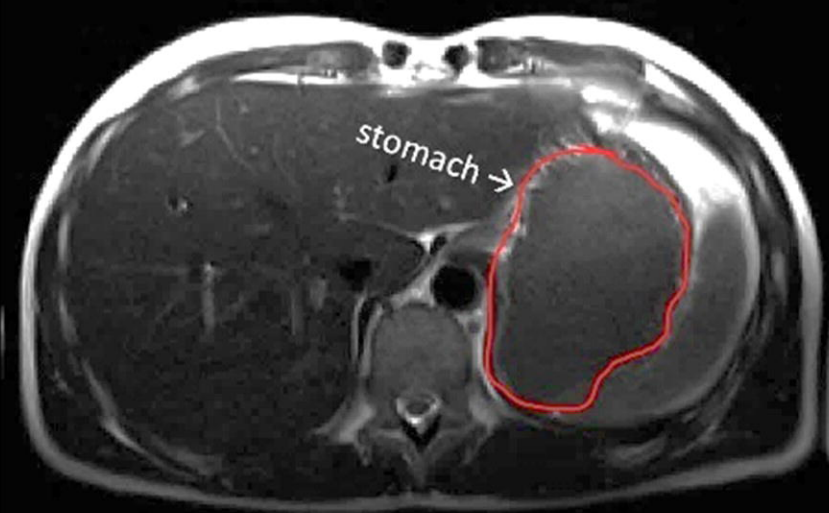

T = 3 min

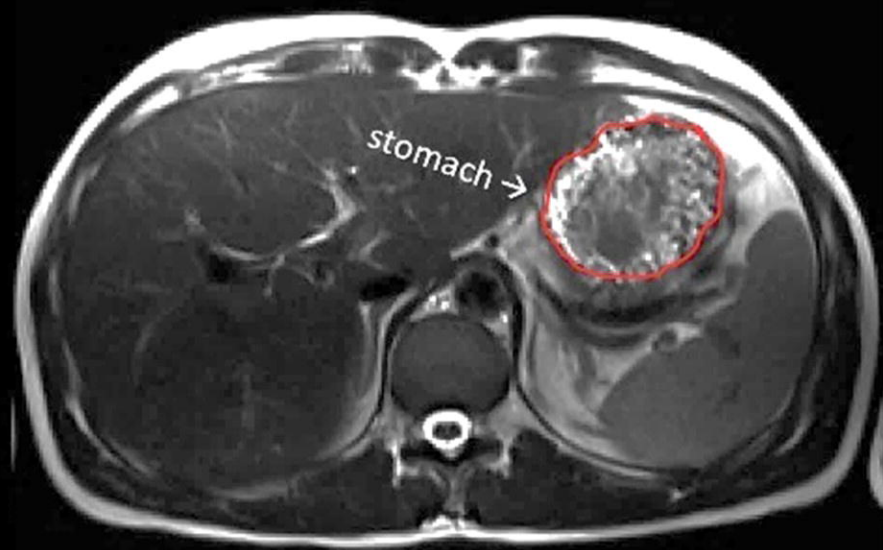

T = 30 min

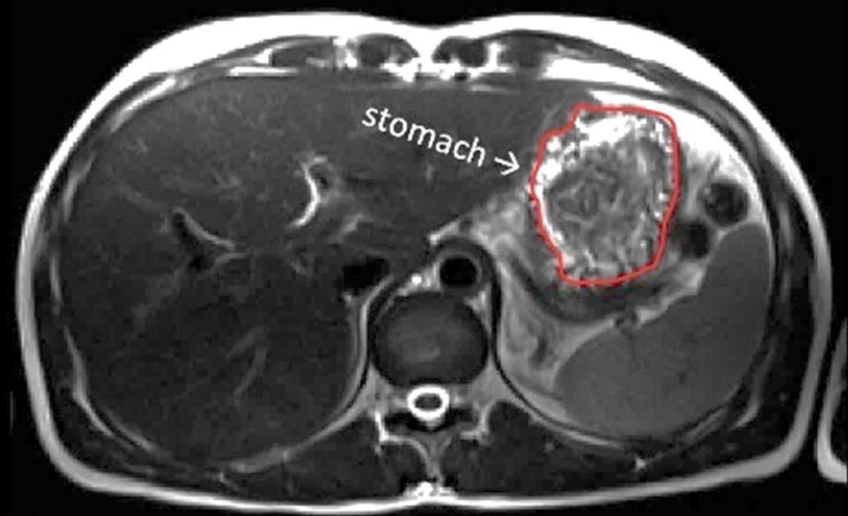

T = 60 min



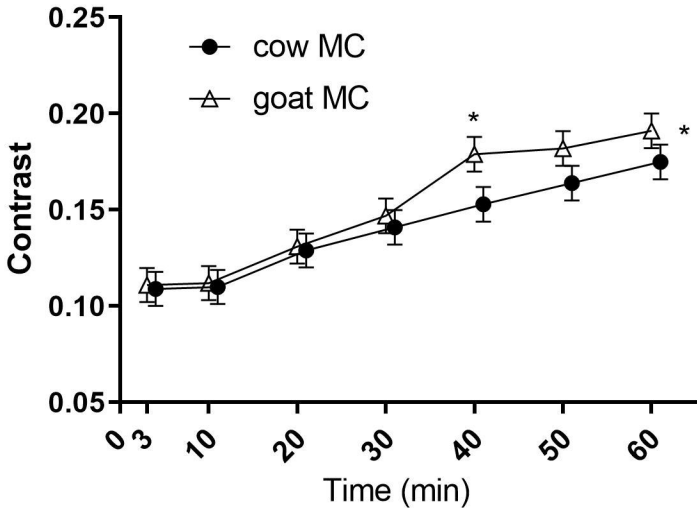

Source: https://www.medrxiv.org/content/10.1101/2024.04.10.24305606v2.full.pdf
